# Supplementary material
Source: PubMed Central journal article supplement (PMC3949635)

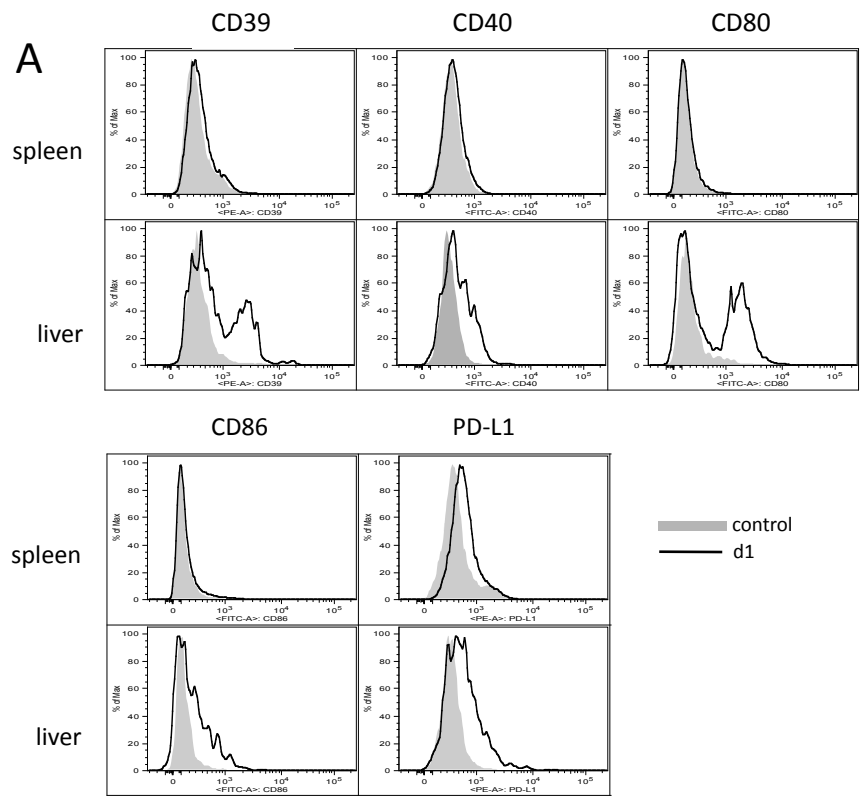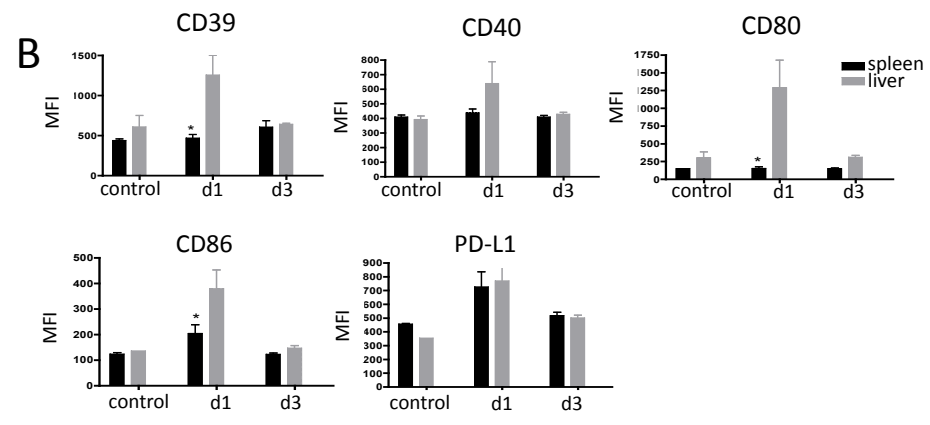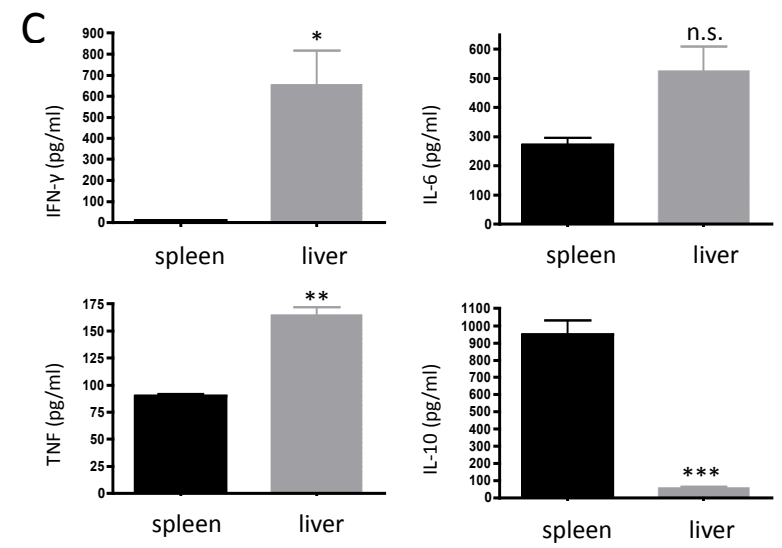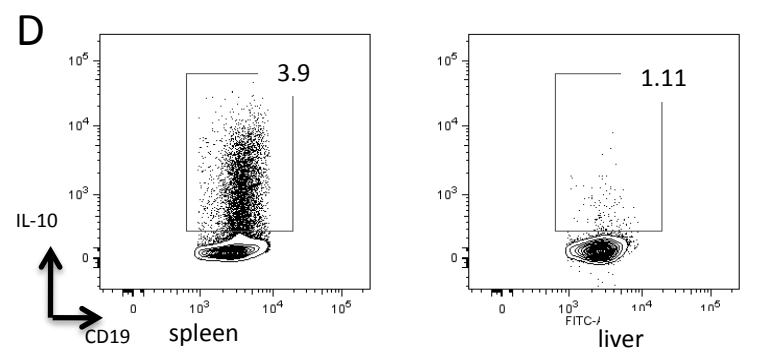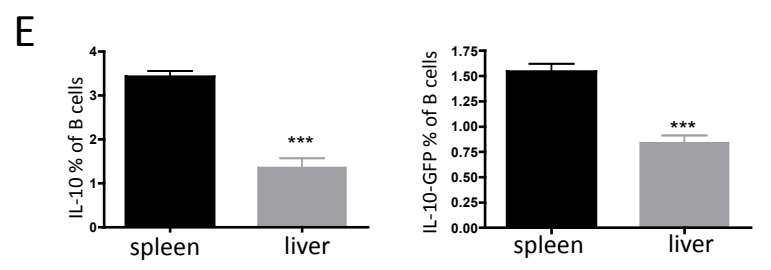

Fig. 1

A

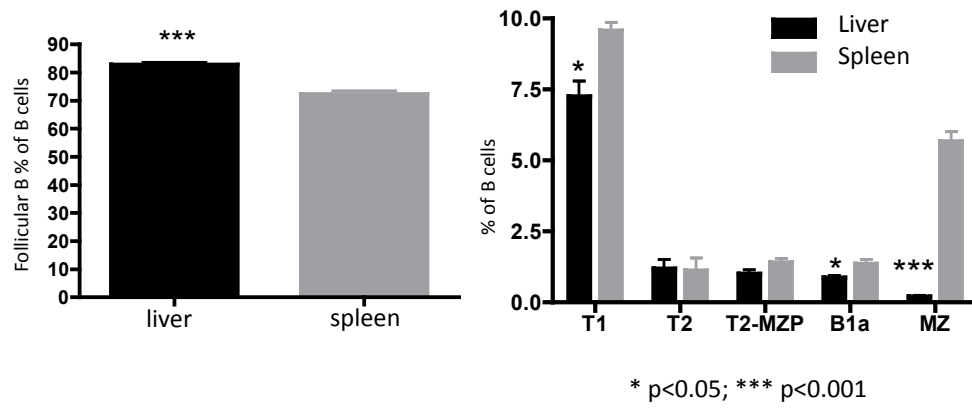

B

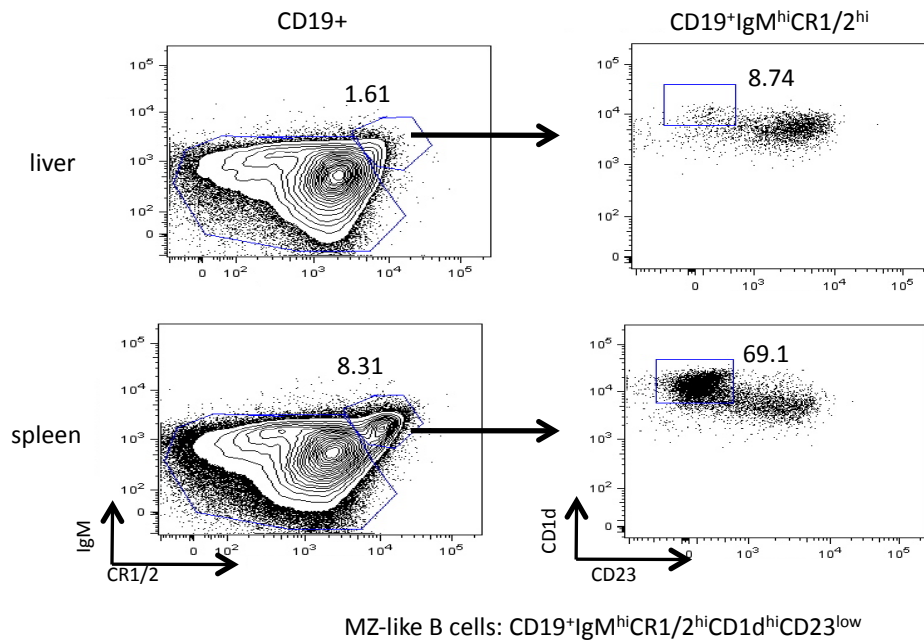

Fig. 2

A

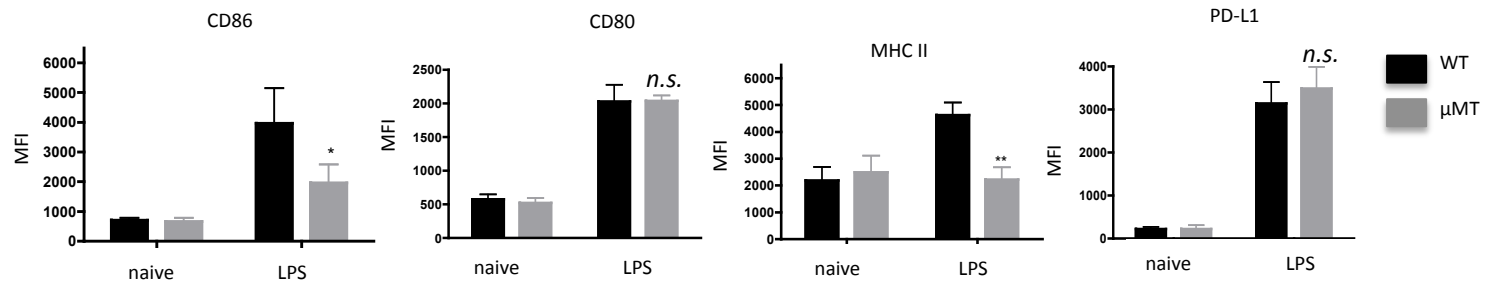

B

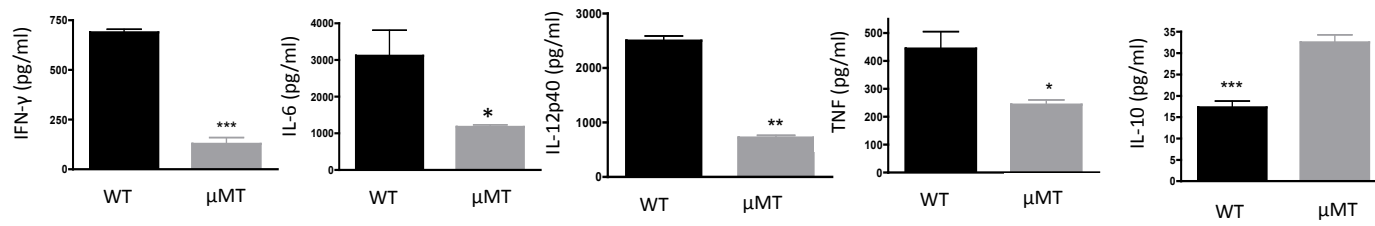

Fig. 3

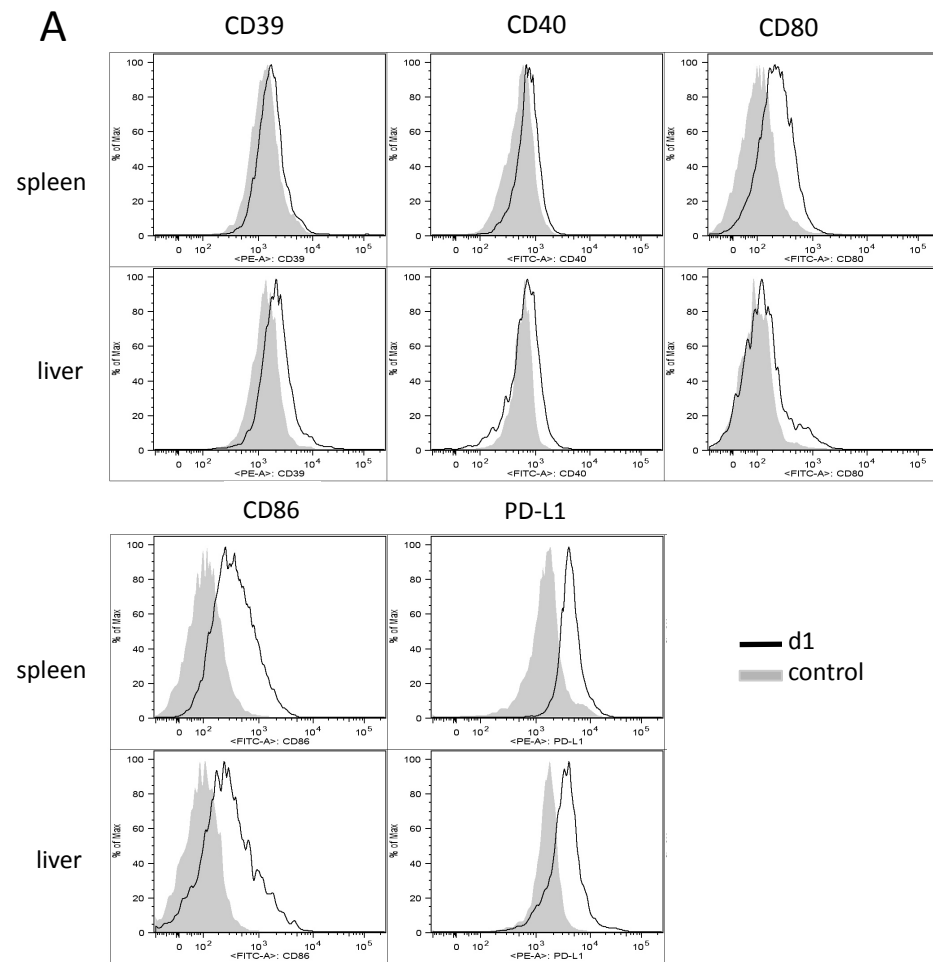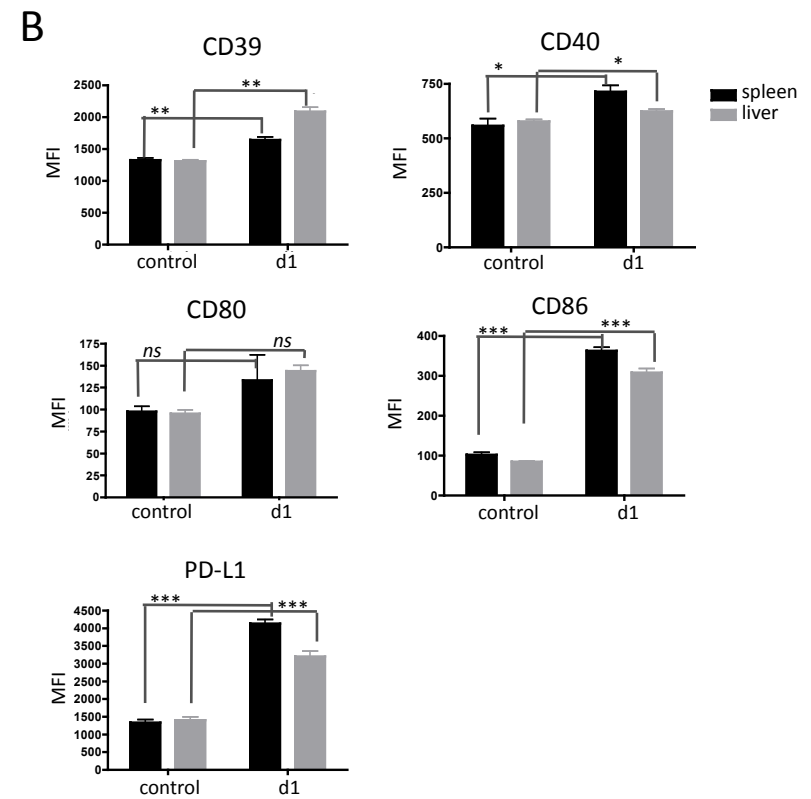

Supplementary Fig. 1

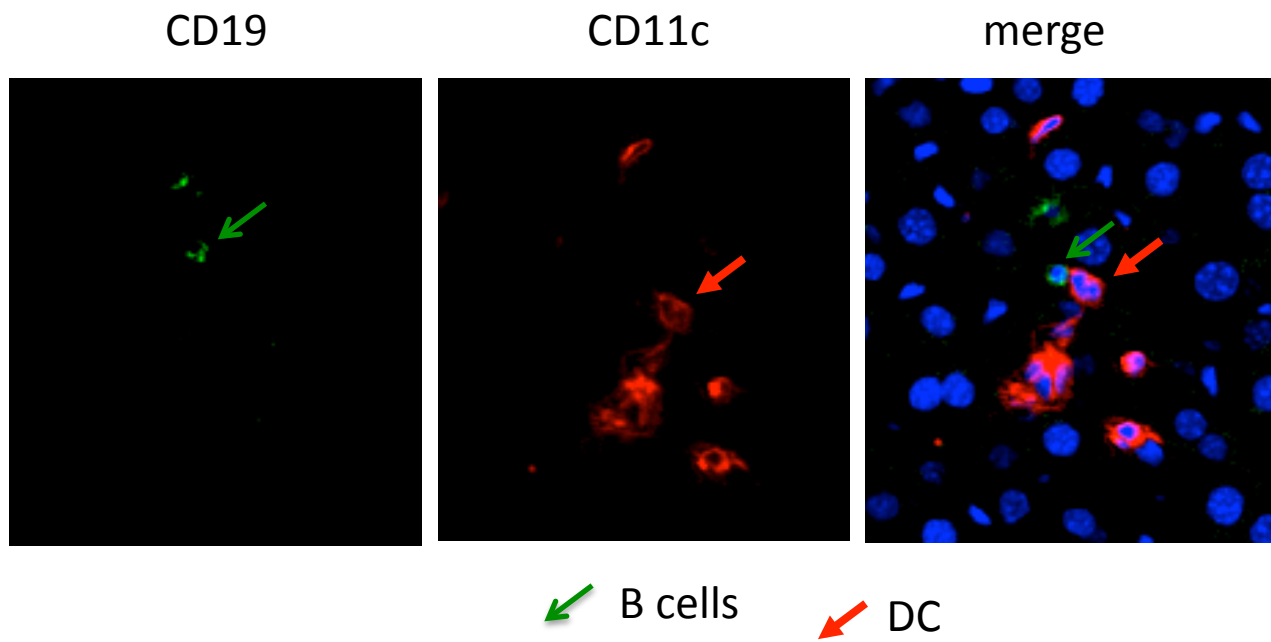

Supplementary Fig. 2

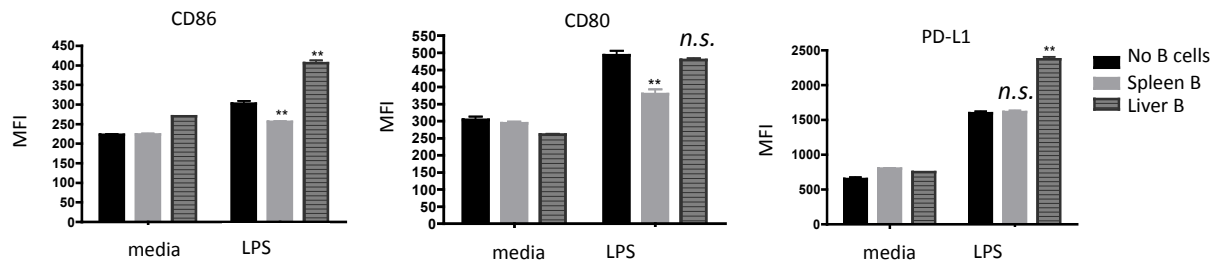

Supplementary Fig. 3

Supplement: cei0173-0473-sd1.pdf [file cei0173-0473-sd1.pdf]
